# Supplementary material
Source: PubMed Central journal article supplement (PMC3255362)
Supplement: supp_CJN.04960511_hospitalized_manuscript_7-25-11_SUPPLEMENTAL.pdf [file supp_CJN.04960511_hospitalized_manuscript_7-25-11_SUPPLEMENTAL.pdf]

**SUPPLEMENTAL DATA**

**Supplemental Table 1.** Urine biomarkers and microscopy by AKI classification

| <b>A. Urine Biomarkers</b> |        | <b>Prerenal<br/>(N=164)</b> | <b>ATN<br/>(N=51)</b> | <b>Other<br/>(N=34)</b> | <b>P *</b> |
|----------------------------|--------|-----------------------------|-----------------------|-------------------------|------------|
| NGAL (ng/mL)               | Mean   | 604 ±2522                   | 1935 ±4934            | 330 ±633                | 0.02       |
|                            | Median | 62 (5.8-1110)               | 215 (12-3766)         | 81 (23-896)             | <0.001     |
| KIM-1 (ng/mL)              | Mean   | 4.5 ±6.3                    | 7.9 ±11               | 3.5 ±4.1                | 0.009      |
|                            | Median | 2.8 (0.6-9.8)               | 4.2 (1.1-13)          | 2.0 (0.3-9.2)           | 0.003      |
| IL-18 (pg/mL)              | Mean   | 180 ±417                    | 344 ±710              | 158 ±176                | 0.04       |
|                            | Median | 70 (0-437)                  | 96 (0-589)            | 98 (0-437)              | 0.002      |
| FeNa (%)                   | Mean   | 1.9 ±2.8                    | 1.5 ±1.7              | 3.4 ±5.3                | 0.01       |
|                            | Median | 0.8 (0.1-4.2)               | 1.0 (0.1-4.3)         | 1.2 (0.1-6.8)           | 0.32       |
| FeUrea (%)                 | Mean   | 19.0 ±53                    | 13.8 ±11.2            | 59.8 ±230               | 0.06       |
|                            | Median | 12.6 (5.0-25.6)             | 10.0 (2.6-28)         | 18.2 (5.7-46.9)         | 0.006      |

  

| <b>B. Urine Microscopy</b> |    | <b>(N=115)</b> | <b>(N=35)</b> | <b>(N=15)</b> | <b>P †</b> |
|----------------------------|----|----------------|---------------|---------------|------------|
| Score                      | 0  | 15 (13)        | 3 (9)         | 3 (20)        | 0.02       |
|                            | 1  | 40 (35)        | 8 (23)        | 3 (20)        |            |
|                            | 2  | 51 (44)        | 15 (43)       | 8 (53)        |            |
|                            | ≥3 | 9 (8)          | 9 (26)        | 1 (7)         |            |

Values presented as mean ±SD, median (10<sup>th</sup>-90<sup>th</sup> percentile), or N (%). AKI, acute kidney injury; NGAL, neutrophil gelatinase-associated lipocalin; KIM-1, kidney injury molecule-1; IL-18, interleukin-18; FeNa, fractional excretion of sodium; FeUrea, fractional excretion of urea.

\* P-value for t-test (means) or Wilcoxon test (medians) comparing prerenal with ATN only.

† P-value for Jonckheere-Terpstra trend test comparing prerenal with ATN only.

**Supplemental Table 2.** Subgroup analyses for biomarker associations with the primary outcome

| <i>Baseline Scr definition</i>                                                                  | <b>Biomarker Quartile</b> | <b>NGAL Unadjusted RR (95% CI)</b>                | <b>KIM-1 Unadjusted RR (95% CI)</b>               | <b>IL-18 Unadjusted RR (95% CI)</b>               | <b>Microscopy Score</b> | <b>Microscopy Unadjusted RR (95% CI)</b>          |
|-------------------------------------------------------------------------------------------------|---------------------------|---------------------------------------------------|---------------------------------------------------|---------------------------------------------------|-------------------------|---------------------------------------------------|
| <b>Admission Scr</b><br>180 subjects for biomarkers<br>117 subjects for microscopy              | First                     | Ref                                               | Ref                                               | Ref                                               | <b>0</b>                | Ref                                               |
|                                                                                                 | Second                    | 2.0 (0.8-4.8)                                     | 1.6 (0.7-3.8)                                     | 1.3 (0.6-2.9)                                     | <b>1</b>                | 3.4 (0.5-25)                                      |
|                                                                                                 | Third                     | 1.4 (0.6-3.7)                                     | 1.4 (0.6-3.4)                                     | 1.7 (0.8-3.7)                                     | <b>2</b>                | 5.1 (0.7-36)                                      |
|                                                                                                 | Fourth                    | 4.4 (2.0-10)                                      | 3.0 (1.4-6.2)                                     | 2.8 (1.4-5.7)                                     | <b>≥3</b>               | 9.8 (1.4-69)                                      |
| <b>Outpatient Scr</b><br>52 subjects for biomarkers<br>36 subjects for microscopy               | First                     | <i>Undefined because of no occurrences in Ref</i> | <i>Undefined because of no occurrences in Ref</i> | <i>Undefined because of no occurrences in Ref</i> | <b>0</b>                | Ref                                               |
|                                                                                                 | Second                    | <i>because of no occurrences in Ref</i>           | <i>because of no occurrences in Ref</i>           | <i>because of no occurrences in Ref</i>           | <b>1</b>                | 0.5 (0.1-2.2)                                     |
|                                                                                                 | Third                     | <i>occurrences in Ref</i>                         | <i>occurrences in Ref</i>                         | <i>occurrences in Ref</i>                         | <b>2</b>                | 0.4 (0.1-1.5)                                     |
|                                                                                                 | Fourth                    |                                                   |                                                   |                                                   | <b>≥3</b>               | 0.8 (0.2-3.4)                                     |
| <b>Lowest Scr before enrollment</b><br>17 subjects for biomarkers<br>12 subjects for microscopy | First                     | <i>Undefined because of no occurrences in Ref</i> | Ref                                               | Ref                                               | <b>0</b>                | <i>Undefined because of no occurrences in Ref</i> |
|                                                                                                 | Second                    | <i>because of no occurrences in Ref</i>           | 1.8 (N/A) *                                       | 0.7 (0.1-4.0)                                     | <b>1</b>                |                                                   |
|                                                                                                 | Third                     | <i>occurrences in Ref</i>                         | 0.9 (0.4-2.2)                                     | 1.0 (0.3-3.5)                                     | <b>2</b>                |                                                   |
|                                                                                                 | Fourth                    |                                                   | 0.1 (N/A) †                                       | 1.0 (0.3-3.5)                                     | <b>≥3</b>               |                                                   |
| <b>Enrollment Location</b>                                                                      |                           |                                                   |                                                   |                                                   |                         |                                                   |
| <b>ICU</b><br>120 subjects for biomarkers<br>90 subjects for microscopy                         | First                     | Ref                                               | Ref                                               | Ref                                               | <b>0</b>                | Ref                                               |
|                                                                                                 | Second                    | 2.4 (0.9-6.2)                                     | 1.6 (0.8-3.4)                                     | 1.1 (0.5-2.4)                                     | <b>1</b>                | 1.3 (0.3-5.4)                                     |
|                                                                                                 | Third                     | 1.7 (0.6-4.8)                                     | 1.1 (0.5-2.5)                                     | 1.2 (0.6-2.4)                                     | <b>2</b>                | 2.0 (0.5-7.3)                                     |
|                                                                                                 | Fourth                    | 4.7 (2.1-11)                                      | 2.1 (1.1-4.3)                                     | 1.9 (1.1-3.5)                                     | <b>≥3</b>               | 2.9 (0.8-11)                                      |
| <b>Floor</b><br>129 subjects for biomarkers<br>75 subjects for microscopy                       | First                     | Ref                                               | Ref                                               | Ref                                               | <b>0</b>                | Ref                                               |
|                                                                                                 | Second                    | 4.5 (0.6-37)                                      | 1.1 (0.2-5.2)                                     | 5.6 (0.7-43)                                      | <b>1</b>                | 2.2 (0.3-17)                                      |
|                                                                                                 | Third                     | 7.7 (1.0-57)                                      | 3.1 (0.9-11)                                      | 5.3 (0.7-41)                                      | <b>2</b>                | 2.6 (0.4-18)                                      |
|                                                                                                 | Fourth                    | 8.9 (1.2-67)                                      | 4.1 (1.3-14)                                      | 9.4 (1.3-69)                                      | <b>≥3</b>               | 4.4 (0.5-38)                                      |
| <b>Days between admission and enrollment</b>                                                    |                           |                                                   |                                                   |                                                   |                         |                                                   |
| <b>Less than 3 days</b><br>107 subjects for biomarkers<br>72 subjects for microscopy            | First                     | Ref                                               | Ref                                               | Ref                                               | <b>0</b>                | Ref                                               |
|                                                                                                 | Second                    | 7.0 (0.9-53)                                      | 1.6 (0.3-8.5)                                     | 6.8 (0.9-50)                                      | <b>1</b>                | 1.1 (0.3-4.7)                                     |
|                                                                                                 | Third                     | 11 (1.5-80)                                       | 4.1 (1.0-17)                                      | 4.3 (0.6-33)                                      | <b>2</b>                | 1.6 (0.4-6.0)                                     |
|                                                                                                 | Fourth                    | 13 (1.8-92)                                       | 5.8 (1.4-23)                                      | 10 (1.4-72)                                       | <b>≥3</b>               | 2.9 (0.7-12)                                      |
| <b>3 to 7 days</b><br>78 subjects for biomarkers<br>50 subjects for microscopy                  | First                     | Ref                                               | Ref                                               | Ref                                               | <b>0</b>                | <i>Undefined because of no occurrences in Ref</i> |
|                                                                                                 | Second                    | 1.9 (0.5-7.0)                                     | 1.2 (0.3-5.1)                                     | 0.9 (0.2-3.8)                                     | <b>1</b>                |                                                   |
|                                                                                                 | Third                     | 0.6 (0.1-3.5)                                     | 1.6 (0.4-6.3)                                     | 1.5 (0.4-5.7)                                     | <b>2</b>                |                                                   |
|                                                                                                 | Fourth                    | 2.8 (0.8-9.9)                                     | 2.6 (0.7-9.1)                                     | 2.0 (0.5-7.0)                                     | <b>≥3</b>               |                                                   |
| <b>Greater than 7 days</b><br>64 subjects for biomarkers<br>43 subjects for microscopy          | First                     | Ref                                               | Ref                                               | Ref                                               | <b>0</b>                | Ref                                               |
|                                                                                                 | Second                    | 1.6 (0.3-7.1)                                     | 1.6 (0.7-3.5)                                     | 1.1 (0.4-2.7)                                     | <b>1</b>                | 2.7 (0.4-17)                                      |
|                                                                                                 | Third                     | 1.8 (0.4-7.8)                                     | 0.6 (0.2-2.2)                                     | 1.4 (0.6-3.2)                                     | <b>2</b>                | 2.1 (0.3-13)                                      |
|                                                                                                 | Fourth                    | 4.1 (1.2-15)                                      | 1.6 (0.7-3.6)                                     | 1.7 (0.8-3.4)                                     | <b>≥3</b>               | 3.3 (0.5-23)                                      |

NGAL, neutrophil gelatinase-associated lipocalin; KIM-1, kidney injury molecule-1; IL-18, interleukin-18; Scr, serum creatinine; RR, relative risk from log-binomial regression; CI, confidence interval.

\* 95% CI not applicable given the primary outcome occurred in all patients in this subgroup quartile of KIM-1.

† 95% CI not applicable given no occurrences for the primary outcome in this subgroup quartile of KIM-1.
